# Supplementary material for: End-Of-Use Fly Ash as an Effective Reinforcing Filler in Green Polymer Composites
Source: MDPI journal article supplement (doi:10.3390/polym15163418), 2023-08-16
Supplement: s1 [file s1]

# End of use fly ash as an effective reinforcing filler in green polymer composites

Anastasios C. Patsidis<sup>1,\*</sup> and Manolis Souliotis<sup>2,\*\*</sup>

<sup>1</sup> Department of Materials Science, University of Patras, Patras 26504, Greece,

<sup>2</sup> Department of Chemical Engineering, University of Western Macedonia, Kozani 50132, Greece,

\* Correspondence: patsidis@upatras.gr; Tel.: +302610997835

\*\* Correspondence: msouliotis@uowm.gr; Tel.: +302461056623

## Supplementary Information

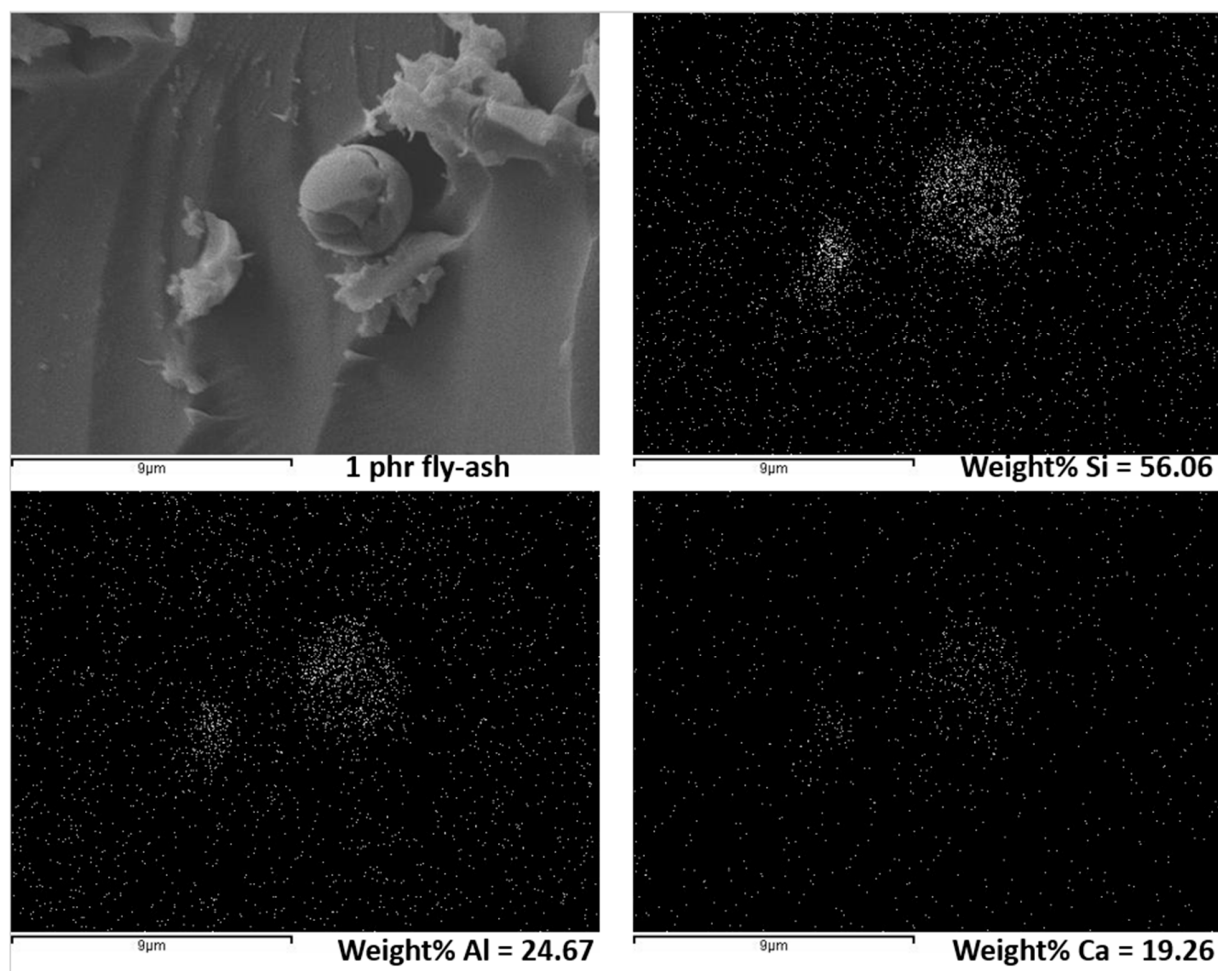

**Figure S1.** Energy-dispersive X-ray spectroscopy spectrum for the composite with 1 phr fly ash. (Mapping)

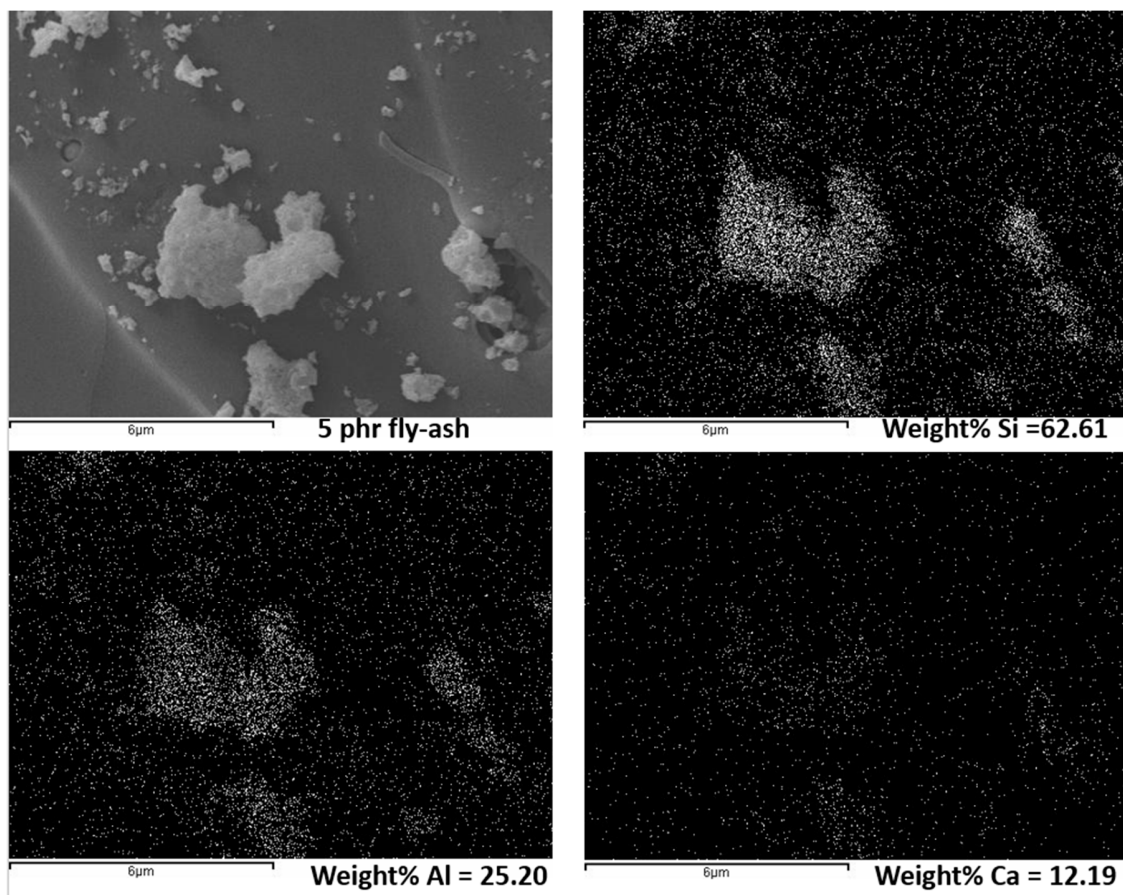

**Figure S2.** Energy-dispersive X-ray spectroscopy spectrum for the composite with 5 phr fly ash. (Mapping)

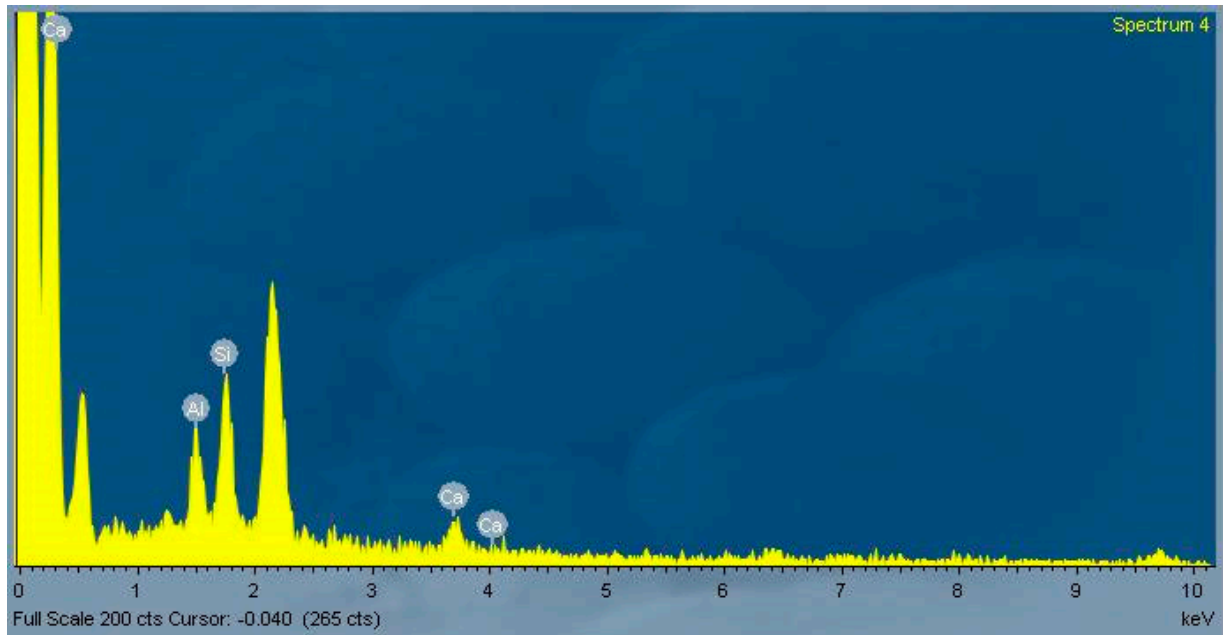

(a)

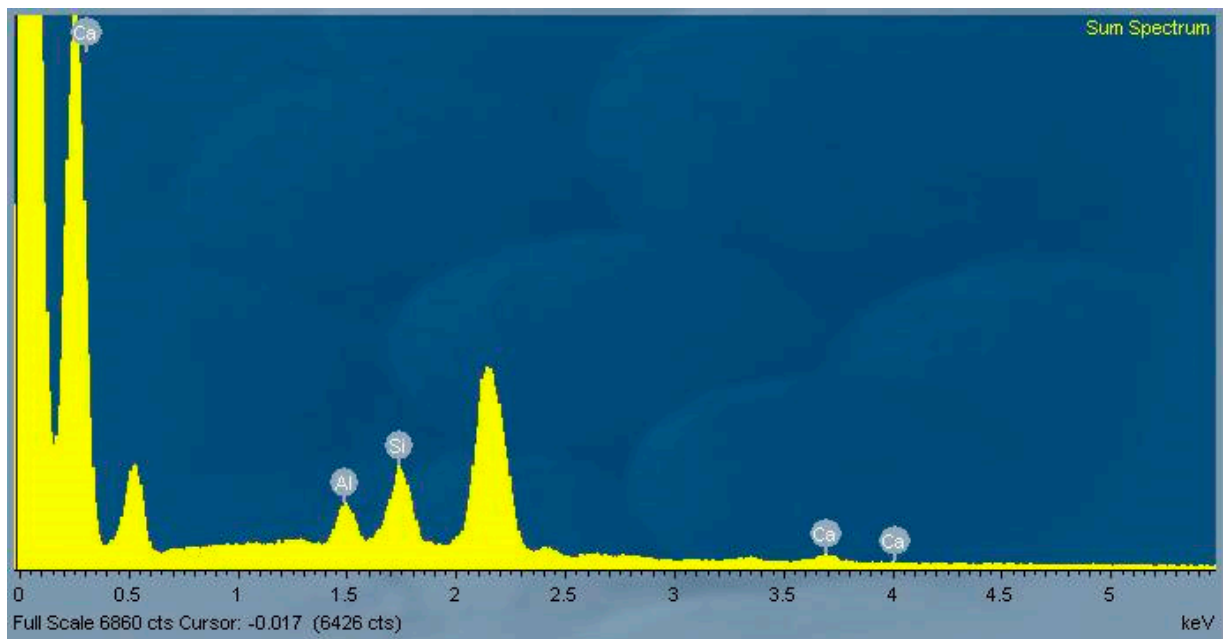

(b)

**Figure S3.** (a) Energy-dispersive X-ray spectroscopy spectrum for the composite with 1 phr fly ash and (b) 5 phr fly ash .

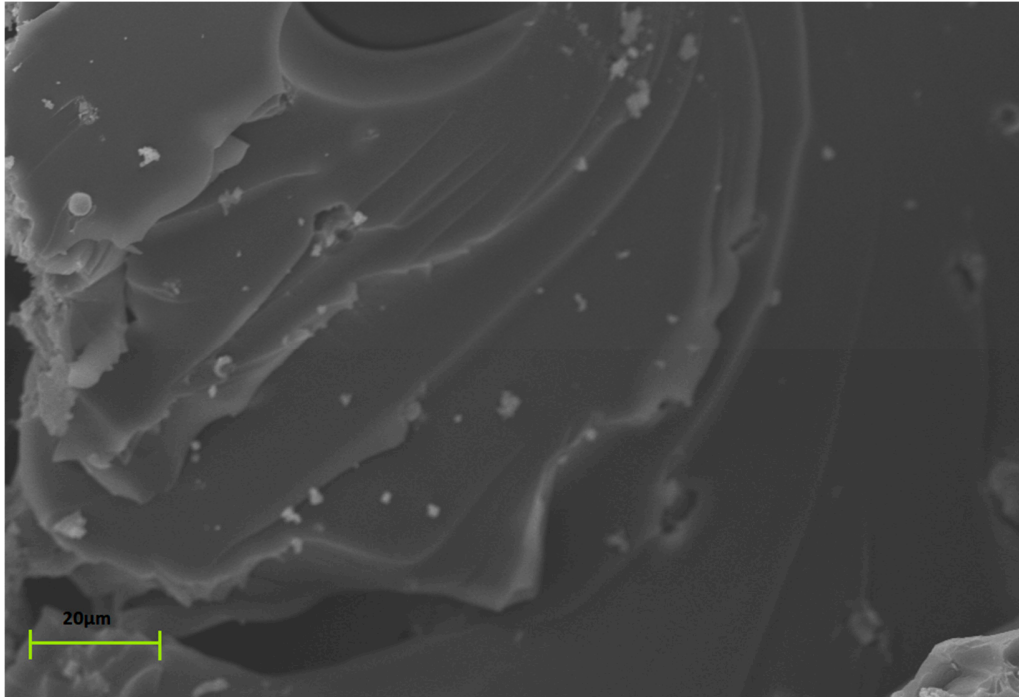

**Figure S4.** SEM image from the composite with 10 phr fly ash content, at a lower magnification.

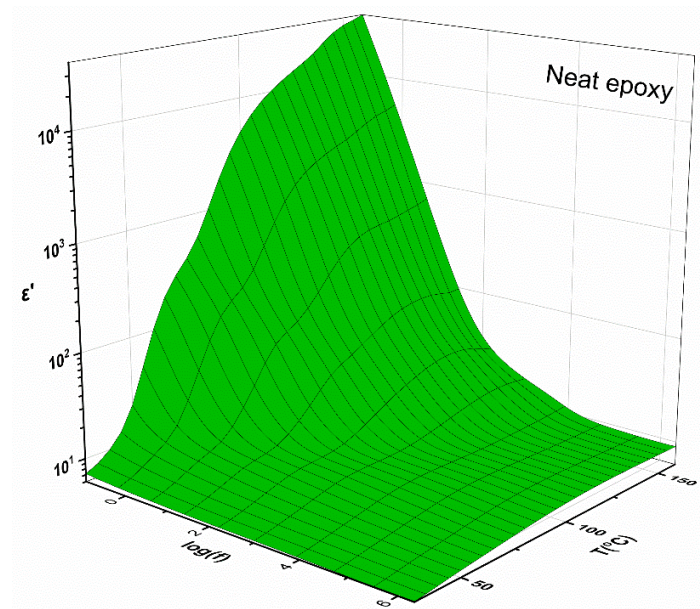

(a)

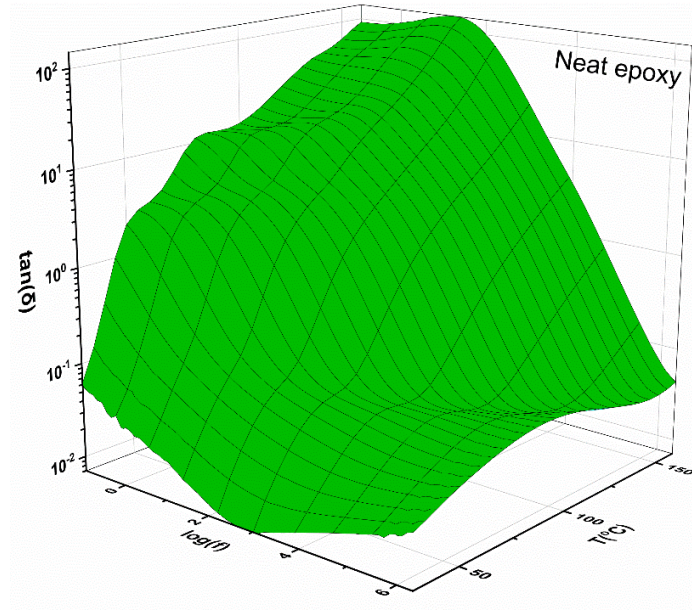

(b)

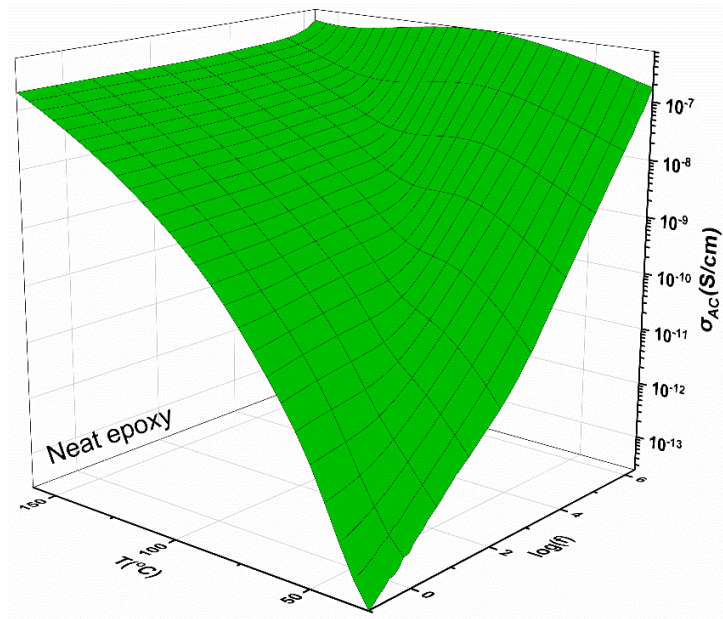

(c)

**Figure S5.** (a) Real part of dielectric permittivity, (b) loss  $\tan\delta$ , and (c)  $\sigma_{ac}$  as a function of frequency and temperature for the neat epoxy composite.



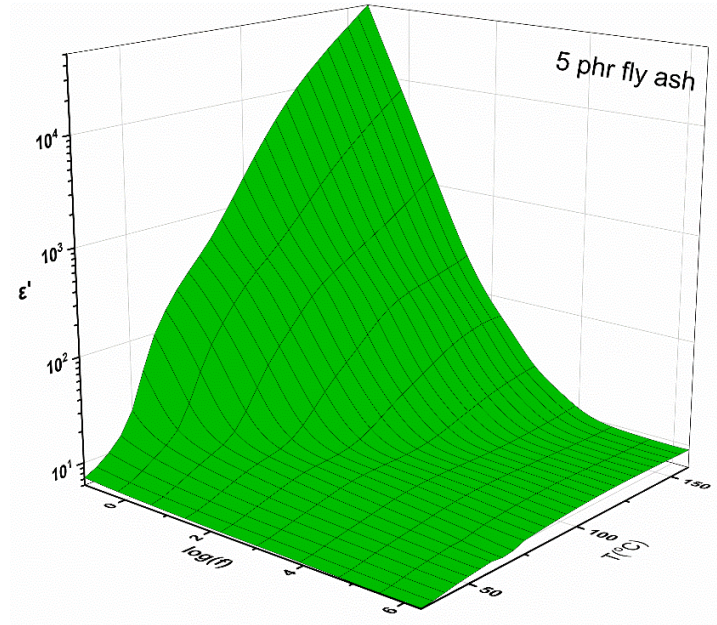

(a)

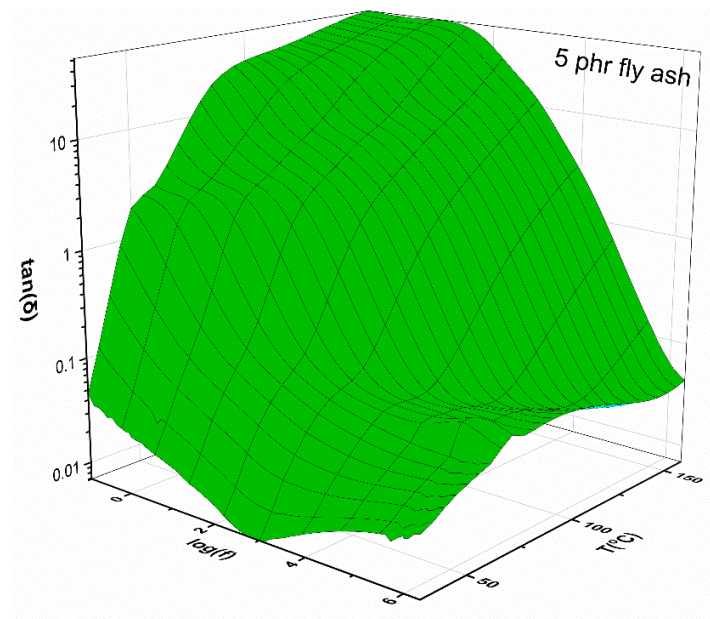

(b)

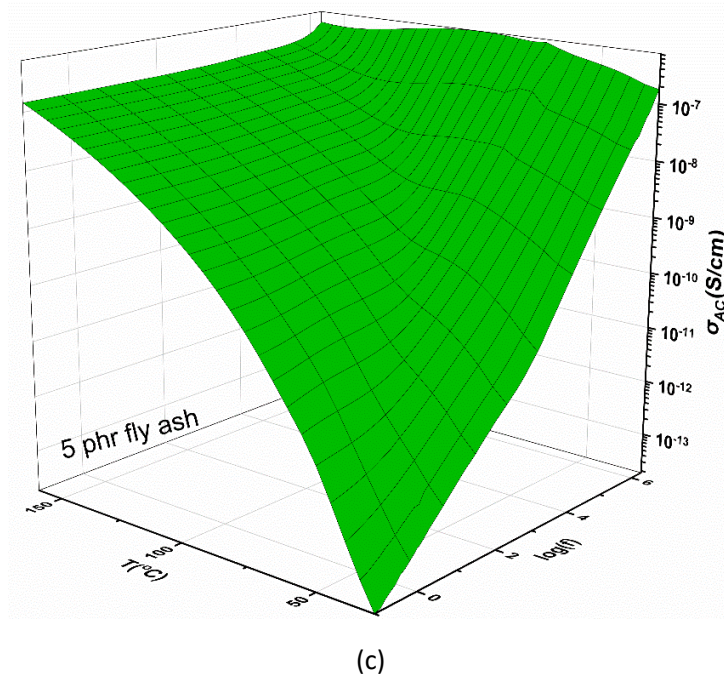

**Figure S6.** (a) Real part of dielectric permittivity, (b) loss  $\tan\delta$ , and (c)  $\sigma_{ac}$  as a function of frequency and temperature for the the 5 phr fly ash/epoxy composite.

**Table S1.** Filler content in specimens,

| Filler content in<br>specimens (phr) | Weight % |       |       |
|--------------------------------------|----------|-------|-------|
|                                      | Si       | Al    | Ca    |
| 1 phr fly-ash                        | 56.06    | 24.67 | 19.26 |
| 5 phr fly-ash                        | 62.61    | 25.20 | 12.19 |
